# Supplementary material
Source: MDPI journal article supplement (https://www.mdpi.com/2073-4344/12/9/997)
Supplement: s1 [file s1]

## Supplementary Materials

### Synthesis of 4-hydroxybenzylideneacetone by Whole-Cell

#### *Escherichia coli*

Authors: Xingmiao Zhu, Pu Zheng\*, Pengcheng Chen, Dan Wu

Institute: The Key Laboratory of Industrial Biotechnology, Ministry of Education,

School of Biotechnology, Jiangnan University, Wuxi 214122, China

\* Corresponding author: Pu Zheng, E-mail: zhengpu@jiangnan.edu.cn, Tel (Fax): 86-510-85918156.

**Table S1.** Plasmids and Strain used in this study

| Plasmids and Strain      | description                                    | source     |
|--------------------------|------------------------------------------------|------------|
| <i>pRSF-Duet-1</i>       | double T7 promoters, RSF ori, Kan <sup>R</sup> | Novagen    |
| <i>pRSF-Deoc</i>         | <i>pRSF-Duet-1</i> carrying <i>Deoc</i>        | this study |
| <i>E. coli</i> JM109     | <i>E. coli</i> JM109 wild type                 | this study |
| <i>E. coli</i> BL21(DE3) | <i>E. coli</i> BL21(DE3) wild type             | this study |
| strain                   | <i>E. coli</i> BL21(DE3)/( <i>pRSF-Deoc</i> )  | this study |

**Table S2.** Primers used in this study

| Primer        | Sequence(5'-3')                  | Restriction site |
|---------------|----------------------------------|------------------|
| <i>Deoc-F</i> | CGGGATCCAATGACTGATCTGAAAGCAAGCAG | <i>Bam</i> HI    |
| <i>Deoc-R</i> | CCCAAGCTTTTAGTAGCTGCTGGCGCTC     | <i>Hind</i> III  |

**Table S3** Gene sequence used in this study

| Gene name | Sequence(5'-3')                                                                                                                                                                                                                                                                                                                                                                                                                                                                                                                                                                                                                                                                                                                                                                                                                                                     |
|-----------|---------------------------------------------------------------------------------------------------------------------------------------------------------------------------------------------------------------------------------------------------------------------------------------------------------------------------------------------------------------------------------------------------------------------------------------------------------------------------------------------------------------------------------------------------------------------------------------------------------------------------------------------------------------------------------------------------------------------------------------------------------------------------------------------------------------------------------------------------------------------|
| Deoc      | ATGACTGATCTGAAAGCAAGCAGCCTGCGTGCACTGAAATTGATGGACCTGAC<br>CACCTGAATGACGACGACACCGACGAGAAAGTAATTGCTCTGTGTCATCAGG<br>CCAAAACCCCGTTCGGCAATACCGCCGCTATCTGTATCTATCCTCGCTTTATCC<br>CGATTGCTCGCAAAACACTGAAAGAGCAGGGCACCCCGGAAATCCGTATTGCT<br>ACGGTAACCAACTTCCCACACGGTAACGATGACATCGAAATCGCGCTGGCAG<br>AAACCCGTGCGGCAATCGCCTACGGTGCCGATGAAGTTGACGTGGTGTTCCTG<br>TACCGCGCGCTGATGGCGGGTAACGAGCAGGTTGGTTTTGACCTGGTGAAAGC<br>CTGTAAAGAGGCTTGCGCGGCAGCGAATGTACTGCTGAAAGTGATCATCGAAA<br>CCGGCGAACTGAAAGACGAAGCGCTGATCCGTAAAGCGTCTGAAATCTCCATC<br>AAAGCGGGTGCGGACTTCATCAAAACCTCTACCGGTAAAGTGCGTGTGAACGC<br>GACGCCGGAAGCGCGCGCATCATGATGGAAGTGATCCGTGATATGGGCGTA<br>GAAAAAACCGTTGGTTTCAAACCAGCGGGCGGCGTGCGTACTGCGGAAGATG<br>CGCAGAAATATCTCGCCATCGCAGATGAACTGTTCCGGTGCTGACTGGGCAGAT<br>GCGCGTCACTACCGCTTTGGTGCTTCCAGCCTGCTGGCAAGCCTGTTGAAAGCG<br>CTGGGCCACGGTGACGGTAAGAGCGCCAGCAGCTACTAA |

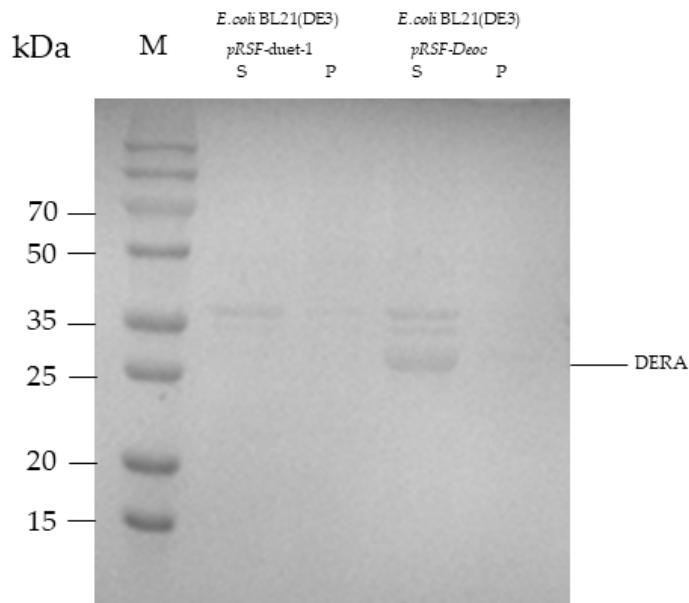

**Figure S1.** SDS-PAGE analysis of *E. coli* BL21(DE3)/pRSF-Deoc and *E. coli* BL21 (DE3) /pRSF-Duet-1 as a negative control. Lane M contains marker proteins, lanes S and P are the supernatant and precipitate of *E. coli* BL21(DE3)/pRSF-Deoc and *E. coli* BL21 (DE3) /pRSF-Duet-1, respectively; DERA (ca. 27.7 kDa) are indicated by the horizontal lines. *E. coli* BL21(DE3)/pRSF-Deoc and *E. coli* BL21 (DE3) /pRSF-Duet-1 were all induced at 20 °C with 0.8 mM IPTG.

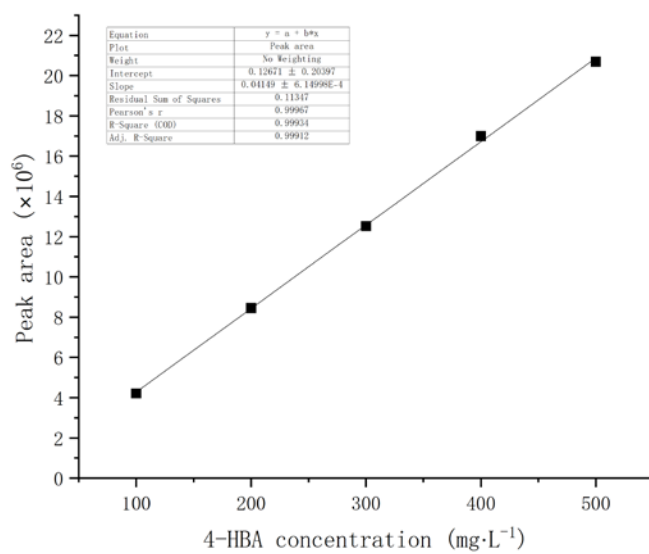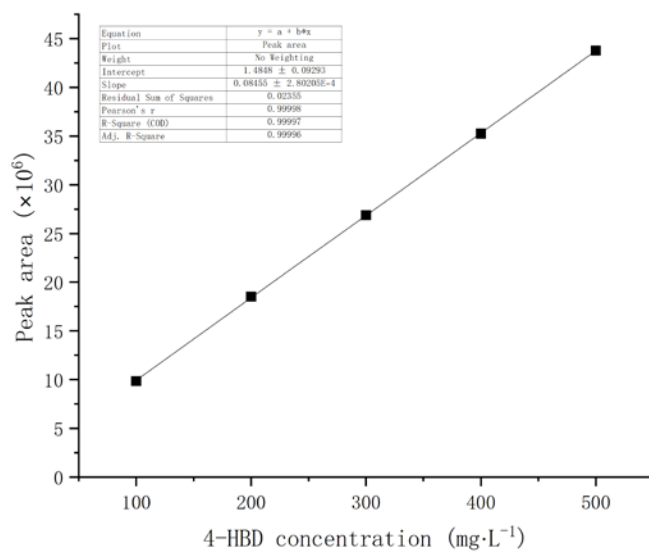

**Figure S2.** Standard curve of 4-HBA and 4-HBD.

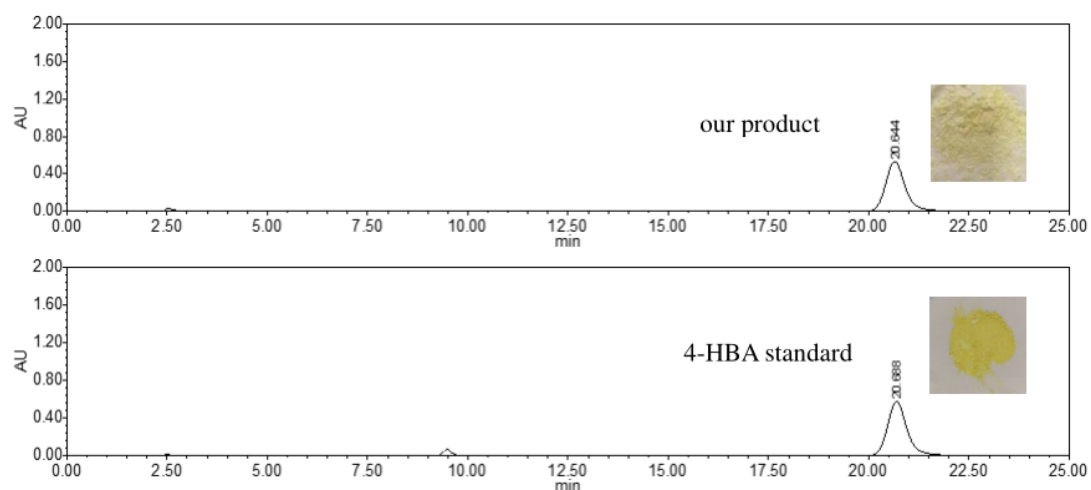

**Figure S3.** HPLC of our product and 4-HBA standard.

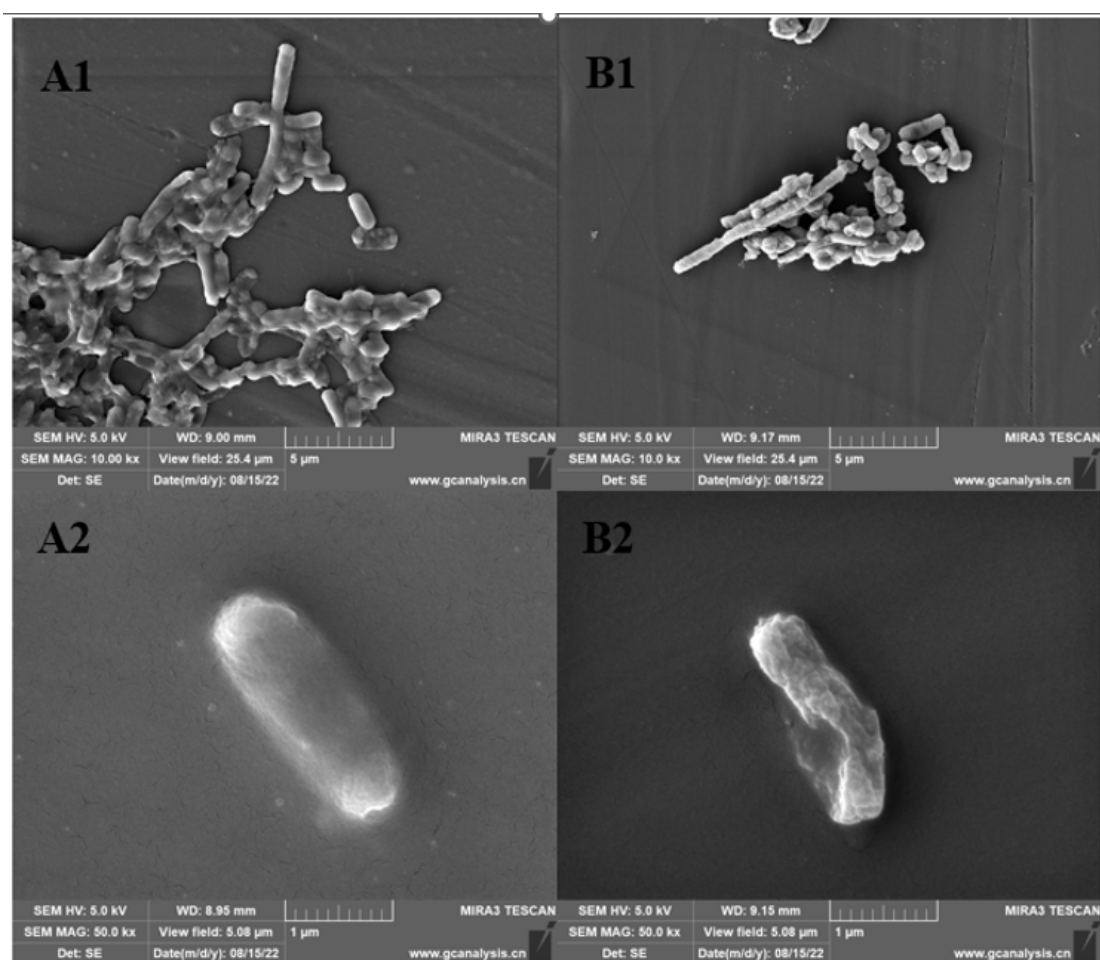

**Figure S4.** SEM images before and after the catalytic reaction. (A1,A2) SEM images before the reaction (resolution of 5μm and 1μm, respectively). (B1,B2) SEM images after the reaction (resolution of 5μm and 1μm, respectively).
